# Supplementary material for: The synthesis of the largest perfluoro macrocycles; perfluoro [60]-crown-20 and perfluoro [30]-crown-10
Source: Royal Society of Chemistry journal article supplement (doi:10.1039/b004168h), 2000-01-01
Supplement: b004168h.doc [file b004168h.doc]

##### *Supplementary Information*

## The synthesis of the largest perfluoro macrocycles;

## perfluoro [60]-crown-20 and perfluoro [30]-crown-10

# Han-Chao Wei † and Richard J. Lagow*

### Department of Chemistry and Biochemistry

#### University of Texas at Austin, Austin, TX 78712-1167, USA

**Experimental Details**

**General.** Gas chromatography was performed on Hewlett-Packard model 5880A, 15% OV-210 on chromosorb A 60/80, 0.25”  10’, isothermal 150 or 200 oC, helium flow rate of 45 mL/min. Perfluorinated products were purified by preparative GC equipped with a OV-210 column. The purity of the perfluorinated products were monitored on an OV-210 column. Low resolution mass spectroscopy were performed on a MAT TSQ-80 spectrometer. High resolution mass spectra were obtained from a VG analytical ZAB2-E mass spectrometer. Methane was used as the reagent gas for the negative mode chemical ionization mass spectra. The 1H, 13C and 19F NMR spectra were taken on a Varian *Unity plus*-300 NMR spectrometer. The 1H NMR were recorded at 300 MHz using CDCl3 as the lock solvent and internal reference. The 13C NMR were recorded at 75 MHz using CDCl3 as the lock solvent and internal reference. The 19F NMR were recorded at 282 MHz using CDCl3 as the lock solvent and CFCl3 as the internal standard (CDCl3/CFCl3 = 1/1). 19F NMR Chemical shifts are given in ppm with negative values indicating resonance at higher frequencies.

**Synthesis of [60]-Crown-20** 1**.** 1.5 g of pure [60]-crown-20 was synthesized by following procedures from the literature 1 as white solid. The melting point of [60]-crown-20 is 48 ~ 51 oC (46 ~ 50.5 oC, lit.1). The yield of [60]-crown-20 was 11% (26%, lit.1). The chemical ionization mass spectral analysis (positive mode): *m/z* (formula, identification, intensity) 881(C40H81O20, M+ + H, 100). Elemental compositions were obtained by high resolution mass spectroscopy in the chemical ionization positive mode. The results were consistent with C40H81O20 (Calcd: 881.5321; Found: 881.5309). 1H NMR (CDCl3, reference to CDCl3)  3.53 ppm (s, OCH2) (3.64 ppm, reference to TMS, lit.1). 13C NMR (CDCl3, reference to CDCl3)  70.29 ppm (70.44 ppm, reference to TMS, lit.1)

**Synthesis of [30]-Crown-10** 1**.** 7.2 g of pure [30]-crown-10 was synthesized by following procedures from the literature 1 as a colorless and viscous oil. The yield of [30]-crown-10 is 78% (55%, lit.1). The chemical ionization mass spectral analysis (positive mode): *m/z* (formula, identification, intensity) 441(C20H41O10, M+ + H, 68). Elemental compositions were studied by high resolution mass spectroscopy in the chemical ionization positive mode. The results were consistent with C20H41O10 (Calcd: 441.2700; Found: 441.2691). 1H NMR (CDCl3, reference to TMS)  3.66 ppm (s, OCH2) (3.67 ppm, reference to TMS, lit.1). 13C NMR (CDCl3, reference to CDCl3)  70.16 ppm (70.55 ppm, reference to TMS, lit.1)

**Synthesis of Perfluoro [60]-Crown-20.** The direct fluorination reaction was performed in a similar manner to the reactions that have been described in literature.2 [60]-crown-20 (1 g) was dissolved in 1,1,2-trichlorotrifluoroethane (300 mL) and chloroform (3 mL) subsequently the solution was slowly introduced into a stainless steel reactor which contained 1,1,2-trichlorotrifluoroethane (600 mL), sodium fluoride (100 g) and a fluorine-helium mixture. During the next 72 hours the relative fluorine concentration were slowly raised. The reaction conditions are summarized in **Table 1**. Filtration of the solution and removal of 1,1,2-trichlorotrifluoroethane by simple distillation and contained a white waxy solid and a viscous oil. The product was purified by preparative gas chromatography on an OV-210 column, 200 oC. Pure perfluoro [60]-crown-20 was collected by preparative GC as white waxy solid in 14% yield. The GC retention time of perfluoro [60]-crown-20 was 20.3 min. Negative chemical ionization mass spectroscopy, **Figure 1**: m/z (formula, identification, intensity) 2320 (C40F80O20, M, 100). The elemental compositions were studied by high resolution mass spectroscopy in chemical ionization negative mode. The results were consistent with C40F80O20 (Calcd: 2319.7706; Found: 2319.7688). 19F NMR (CFCl3)  89.45 ppm (s, 80F), **Figure 2**.

**Synthesis of Perfluoro [30]-crown-10.** [30]-crown-10 (5 g) was dissolved in 1,1,2-trichlorotrifluoroethane (300 mL) subsequently the solution was slowly introduced into a stainless steel reactor which contained 1,1,2-trichlorotrifluoroethane (700 mL), 120 g of sodium fluoride and a fluorine-helium mixture. During the next 84 hours both the relative fluorine concentration and the reaction temperature were slowly increased. The reaction conditions are summarized in **Table 2**. Filtration of the solution and removal of 1,1,2-trichlorotrifluoroethane by simple distillation and left a colorless oil. The product was purified by preparative gas chromatography on a OV-210 column, 150 oC. Pure perfluoro [30]-crown-10 was collected by preparative GC as a colorless liquid in 50% yield. The GC retention time of perfluoro [30]-crown-10 was 8.7 min. Fast atom bombardment (FAB) mass spectral analysis (negative mode), **Figure 3**: m/z (formula, identification, intensity) 1159 (C20F40O10, M, 100). The elemental compositions were studied by high resolution mass spectroscopy in FAB negative mode. The results were consistent with C20F40O10 (Calcd: 1159.8853; Found: 1159.8844). 19F NMR (CFCl3)  89.48 ppm (s, 40F), **Figure 4**.

**REFERENCE**

1. R. Chênevert and L. D’Astous, *J. Heterocyclic Chem*., 1986, **23**, 1785-1787.

2. H. C. Wei, S. Corbelin, and R. J. Lagow, *J. Org. Chem*., 1996, **61**, 1643-1644.

**Table 1.** Direct fluorination condition of perfluoro [60]-crown-20.

| **Stage** | **He(mL/min.)** | **F2(mL/min.)** | **Temperature(oC)** | **Time(hour)** |
| --- | --- | --- | --- | --- |
| 1 | 200 | 0 | Ambient (26~27) | 0.5 |
| 2 | 200 | 50 | Ambient (26~27) | 3.5 |
| 3 | 10 | 10 | Ambient (26~27) | 24 |
| 3 | 0 | 10 | Ambient (26~27) | 48 |
| 5 | 50 | 0 | Ambient (26~27) | 4 |

**Table 2.** Direct fluorination condition of perfluoro [30]-crown-10.

| **Stage** | **He(mL/min.)** | **F2(mL/min.)** | **Temperature(oC)** | **Time(hour)** |
| --- | --- | --- | --- | --- |
| 1 | 400 | 0 | 20 | 0.5 |
| 2 | 400 | 90 | 20 | 3.5 |
| 3 | 10 | 10 | 0 | 24 |
| 4 | 10 | 10 | Ambient (22~23) | 24 |
| 5 | 0 | 10 | Ambient (22~23) | 24 |
| 6 | 0 | 10 | Ambient (22~23) | 40 |
| 7 | 50 | 0 | Ambient (22~23) | 4 |
